# Supplementary material for: Analysis of Race and Sex Bias in the Autism Diagnostic Observation Schedule (ADOS-2)
Source: PubMed Central journal article supplement (PMC9044110; doi:10.1001/jamanetworkopen.2022.9498), 2022-04-26

## Supplemental Online Content

Kalb LG, Singh V, Hong JS, et al. Analysis of race and sex bias in the Autism Diagnostic Observation Schedule (ADOS-2). *JAMA Netw Open*. 2022;5(4):e229498. doi:10.1001/jamanetworkopen.2022.9498

- eTable 1.** IRT Parameters and ADOS Characteristics for Items With Suspected DIF by Sex
- eTable 2.** IRT Parameters and ADOS Characteristics for Items With Suspected DIF by Race
- eTable 3.** Fit Statistics by ADOS-2 Algorithm
- eFigure 1.** Item Response Theory Curves by Race
- eFigure 2.** Item Response Theory Curves by Sex

This supplemental material has been provided by the authors to give readers additional information about their work.

eTable 1: IRT Parameters and ADOS Characteristics for Items With Suspected DIF by Sex

|                      | Mod 1 - Algorithm 1 |                | Mod 1 - Algorithm 2 |                | Mod 2 - Algorithm 1 |                | Mod 2 - Algorithm 2 |                | Mod3           |                 |
|----------------------|---------------------|----------------|---------------------|----------------|---------------------|----------------|---------------------|----------------|----------------|-----------------|
|                      | F                   | M              | F                   | M              | F                   | M              | F                   | M              | F              | M               |
| N (%)                | 184<br>(22.7%)      | 624<br>(77.3%) | 198<br>(19.1%)      | 841<br>(80.9%) | 189<br>(22.8%)      | 638<br>(77.2%) | 110<br>(18.9%)      | 472<br>(81.1%) | 611<br>(20.4%) | 2390<br>(79.6%) |
| ADOS-2 Items (M, SD) |                     |                |                     |                |                     |                |                     |                |                |                 |
| Eye Contact          | 1.71 (0.71)         | 1.75 (0.66)    | 1.62 (0.79)         | 1.45 (0.89)    | 1.17 (0.99)         | 1.23 (0.97)    | 1.24 (0.98)         | 1.33 (0.94)    | 0.92 (1.00)    | 1.06 (1.00)     |
| Gaze                 | 1.46 (0.68)         | 1.42 (0.67)    | 0.96 (0.70)         | 0.89 (0.67)    | 0.93 (0.79)         | 1.00 (0.83)    | 1.15 (0.81)         | 1.20 (0.81)    | 0.57 (0.66)    | 0.63 (0.70)     |
| Facial Expressions   | 1.32 (0.62)         | 1.24 (0.60)    | 1.05 (0.57)         | 0.87 (0.59)    | 0.53 (0.58)         | 0.65 (0.59)    | 0.81 (0.67)         | 0.74 (0.64)    | 0.51 (0.63)    | 0.60 (0.65)     |
| Vocalization         | 1.73 (0.56)         | 1.68 (0.58)    | 0.94 (0.70)         | 0.87 (0.69)    | 0.62 (0.72)         | 0.66 (0.70)    | 0.90 (0.75)         | 0.98 (0.79)    | 0.61 (0.67)    | 0.69 (0.70)     |
| Shared Enjoyment     | 1.24 (0.79)         | 1.07 (0.77)    | 0.82 (0.75)         | 0.64 (0.73)    | 0.35 (0.64)         | 0.38 (0.66)    | 0.57 (0.76)         | 0.57 (0.73)    | 0.44 (0.68)    | 0.56 (0.72)     |
| Social Overtures     | 1.61 (0.61)         | 1.52 (0.61)    | 1.18 (0.67)         | 1.08 (0.64)    | 0.79 (0.63)         | 0.84 (0.60)    | 0.98 (0.68)         | 1.06 (0.67)    | 0.68 (0.59)    | 0.75 (0.61)     |
| RJA                  | 1.20 (0.84)         | 1.14 (0.81)    | 1.13 (0.79)         | 1.06 (0.81)    | 0.69 (0.64)         | 0.67 (0.69)    | 0.80 (0.71)         | 0.74 (0.68)    | 0.67 (0.67)    | 0.81 (0.72)     |
| Gestures             | 1.22 (0.71)         | 1.25 (0.69)    | 0.95 (0.72)         | 0.91 (0.72)    | 0.89 (0.77)         | 0.94 (0.75)    | 0.94 (0.76)         | 1.02 (0.73)    | 0.35 (0.56)    | 0.42 (0.60)     |
| Social Response      | 1.72 (0.61)         | 1.71 (0.61)    | 1.29 (0.82)         | 1.21 (0.82)    | 0.62 (0.75)         | 0.62 (0.74)    | 0.84 (0.82)         | 0.80 (0.82)    | 0.72 (0.59)    | 0.81 (0.61)     |
| IJA                  | 1.44 (0.83)         | 1.42 (0.79)    | 1.02 (0.88)         | 0.97 (0.86)    | 0.54 (0.72)         | 0.52 (0.70)    | 0.72 (0.77)         | 0.68 (0.78)    | 0.48 (0.63)    | 0.62 (0.68)     |
| Stereotyped Language | 0.98 (0.95)         | 0.82 (0.92)    | 0.95 (0.82)         | 0.87 (0.82)    | 0.72 (0.77)         | 0.69 (0.72)    | 0.88 (0.83)         | 0.79 (0.82)    | 0.46 (0.62)    | 0.54 (0.66)     |
| Sensory Interest     | 1.18 (0.90)         | 1.28 (0.86)    | 0.88 (0.86)         | 0.93 (0.87)    | 0.44 (0.72)         | 0.62 (0.81)    | 0.62 (0.83)         | 0.79 (0.87)    | 0.18 (0.49)    | 0.24 (0.56)     |
| Repetitive Interest  | 1.17 (0.95)         | 1.25 (0.91)    | 0.93 (0.93)         | 0.92 (0.92)    | 0.42 (0.75)         | 0.55 (0.81)    | 0.47 (0.77)         | 0.57 (0.85)    | 0.25 (0.60)    | 0.25 (0.60)     |
| Hand Mannerisms      | 1.46 (0.75)         | 1.60 (0.64)    | 1.32 (0.75)         | 1.41 (0.72)    | 0.85 (0.78)         | 1.11 (0.80)    | 0.92 (0.78)         | 1.16 (0.79)    | 0.45 (0.66)    | 0.66 (0.77)     |
| ADOS-2 CSS (M, SD)   |                     |                |                     |                |                     |                |                     |                |                |                 |
| CSS                  | 6.88 (2.44)         | 6.73 (2.28)    | 6.43 (2.70)         | 6.13 (2.65)    | 4.80 (2.99)         | 5.24 (2.75)    | 5.39 (2.73)         | 5.65 (2.63)    | 4.28 (2.91)    | 4.95 (3.02)     |
| SA CSS               | 6.51 (2.42)         | 6.26 (2.26)    | 6.08 (2.65)         | 5.65 (2.60)    | 5.10 (2.85)         | 5.28 (2.68)    | 5.64 (2.73)         | 5.74 (2.61)    | 4.69 (2.86)    | 5.29 (2.95)     |
| RRB CSS              | 7.60 (2.26)         | 7.90 (2.04)    | 7.37 (2.35)         | 7.51 (2.37)    | 5.35 (2.76)         | 6.01 (2.60)    | 5.61 (2.82)         | 6.13 (2.71)    | 4.19 (3.04)    | 4.92 (3.13)     |
| ADOS-2 Status (N, %) |                     |                |                     |                |                     |                |                     |                |                |                 |
| No ASD/Autism        | 22 (12.0%)          | 58 (9.29%)     | 35 (17.7%)          | 163<br>(19.4%) | 75 (39.7%)          | 195<br>(30.6%) | 35 (31.8%)          | 134<br>(28.5%) | 305<br>(49.9%) | 1011<br>(42.3%) |
| ASD                  | 12 (6.52%)          | 78 (12.5%)     | 24 (12.1%)          | 120<br>(14.3%) | 28 (14.8%)          | 107<br>(16.8%) | 7 (6.36%)           | 29 (6.16%)     | 73 (11.9%)     | 265<br>(11.1%)  |
| Autism               | 150<br>(81.5%)      | 488<br>(78.2%) | 139<br>(70.2%)      | 558<br>(66.3%) | 86 (45.5%)          | 336<br>(52.7%) | 68 (61.8%)          | 308<br>(65.4%) | 233<br>(38.1%) | 1113<br>(46.6%) |

\*M (Male), F (Female), SA (Social Affect), RRB (Repetitive, Restrictive Behaviors), RAJ (Response to Joint Attention), IJA (Initiates Joint Attention)

eTable 2: IRT Parameters and ADOS Characteristics for Items With Suspected DIF by Race

|                      | Mod 1 - Algorithm 1 |                | Mod 1 - Algorithm 2 |                | Mod 2 - Algorithm 1 |                | Mod 2 - Algorithm 2 |             | Mod3            |             |
|----------------------|---------------------|----------------|---------------------|----------------|---------------------|----------------|---------------------|-------------|-----------------|-------------|
| Race                 | White               | Black/AA       | White               | Black/AA       | White               | Black/AA       | White               | Black/AA    | White           | Black/AA    |
| N (%)                | 287(50.0%)          | 287<br>(50.0%) | 417 (59.4%)         | 285<br>(40.6%) | 439 (71.4%)         | 176<br>(28.6%) | 209<br>(50.1%)      | 206 (49.9%) | 1765<br>(72.3%) | 657 (27.7%) |
| ADOS-2 Items (M, SD) |                     |                |                     |                |                     |                |                     |             |                 |             |
| Eye Contact          | 1.76 (0.66)         | 1.78 (0.63)    | 1.44 (0.90)         | 1.52 (0.85)    | 1.24 (0.97)         | 1.14 (0.99)    | 1.26 (0.97)         | 1.34 (0.94) | 1.01 (1.00)     | 1.13 (0.99) |
| Gaze                 | 1.46 (0.68)         | 1.38 (0.66)    | 0.83 (0.69)         | 0.96 (0.67)    | 0.92 (0.82)         | 0.99 (0.82)    | 1.12 (0.81)         | 1.22 (0.81) | 0.58 (0.67)     | 0.69 (0.72) |
| Facial Expressions   | 1.28 (0.60)         | 1.26 (0.60)    | 0.88 (0.60)         | 0.90 (0.58)    | 0.66 (0.61)         | 0.58 (0.57)    | 0.78 (0.66)         | 0.76 (0.65) | 0.55 (0.63)     | 0.66 (0.67) |
| Vocalization         | 1.66 (0.59)         | 1.74 (0.52)    | 0.80 (0.67)         | 0.94 (0.69)    | 0.64 (0.70)         | 0.73 (0.71)    | 0.94 (0.79)         | 1.02 (0.78) | 0.67 (0.68)     | 0.70 (0.70) |
| Shared Enjoyment     | 1.13 (0.76)         | 1.09 (0.77)    | 0.68 (0.76)         | 0.65 (0.71)    | 0.40 (0.68)         | 0.40 (0.67)    | 0.61 (0.77)         | 0.57 (0.73) | 0.50 (0.69)     | 0.61 (0.76) |
| Social Overtures     | 1.51 (0.62)         | 1.57 (0.59)    | 1.02 (0.65)         | 1.15 (0.63)    | 0.81 (0.60)         | 0.87 (0.62)    | 1.04 (0.67)         | 1.03 (0.68) | 0.74 (0.60)     | 0.72 (0.60) |
| RJA                  | 1.13 (0.80)         | 1.25 (0.79)    | 0.98 (0.79)         | 1.17 (0.78)    | 0.64 (0.66)         | 0.71 (0.69)    | 0.68 (0.68)         | 0.78 (0.69) | 0.75 (0.70)     | 0.87 (0.74) |
| Gestures             | 1.18 (0.73)         | 1.29 (0.64)    | 0.85 (0.68)         | 1.00 (0.74)    | 0.90 (0.74)         | 1.02 (0.77)    | 0.99 (0.76)         | 1.04 (0.72) | 0.38 (0.58)     | 0.49 (0.63) |
| Social Response      | 1.72 (0.58)         | 1.72 (0.59)    | 1.17 (0.84)         | 1.30 (0.81)    | 0.63 (0.75)         | 0.60 (0.76)    | 0.78 (0.82)         | 0.90 (0.83) | 0.78 (0.59)     | 0.80 (0.62) |
| IJA                  | 1.41 (0.81)         | 1.44 (0.77)    | 0.93 (0.86)         | 0.99 (0.86)    | 0.53 (0.71)         | 0.51 (0.73)    | 0.63 (0.77)         | 0.73 (0.78) | 0.55 (0.66)     | 0.67 (0.68) |
| Stereotyped Language | 0.84 (0.92)         | 0.92 (0.94)    | 0.80 (0.81)         | 0.93 (0.81)    | 0.68 (0.71)         | 0.71 (0.77)    | 0.81 (0.83)         | 0.85 (0.85) | 0.53 (0.65)     | 0.49 (0.64) |
| Sensory Interest     | 1.24 (0.89)         | 1.29 (0.84)    | 0.87 (0.87)         | 0.97 (0.89)    | 0.58 (0.78)         | 0.57 (0.81)    | 0.77 (0.87)         | 0.80 (0.87) | 0.22 (0.54)     | 0.25 (0.57) |
| Repetitive Interest  | 1.30 (0.90)         | 1.17 (0.95)    | 0.93 (0.92)         | 0.91 (0.92)    | 0.53 (0.80)         | 0.51 (0.79)    | 0.69 (0.88)         | 0.43 (0.77) | 0.26 (0.62)     | 0.22 (0.55) |
| Hand Mannerisms      | 1.56 (0.68)         | 1.57 (0.69)    | 1.36 (0.74)         | 1.38 (0.71)    | 1.08 (0.81)         | 0.97 (0.82)    | 1.10 (0.83)         | 1.10 (0.78) | 0.63 (0.76)     | 0.52 (0.69) |
| ADOS-2 CSS (M, SD)   |                     |                |                     |                |                     |                |                     |             |                 |             |
| CSS                  | 6.73 (2.30)         | 6.84 (2.17)    | 5.90 (2.81)         | 6.40 (2.50)    | 5.10 (2.86)         | 5.18 (2.78)    | 5.52 (2.78)         | 5.73 (2.61) | 4.70 (2.94)     | 5.05 (3.04) |
| SA CSS               | 6.27 (2.32)         | 6.40 (2.14)    | 5.46 (2.63)         | 5.96 (2.53)    | 5.20 (2.75)         | 5.28 (2.63)    | 5.57 (2.73)         | 5.83 (2.64) | 5.03 (2.87)     | 5.51 (2.99) |
| RRB CSS              | 7.86 (2.09)         | 7.90 (2.05)    | 7.37 (2.51)         | 7.54 (2.25)    | 5.90 (2.65)         | 5.70 (2.69)    | 6.14 (2.82)         | 6.00 (2.64) | 4.80 (3.14)     | 4.51 (3.10) |
| ADOS-2 Status (N, %) |                     |                |                     |                |                     |                |                     |             |                 |             |
| No ASD/Autism        | 30 (10.5%)          | 20 (6.97%)     | 96 (23.0%)          | 44 (15.4%)     | 152 (34.6%)         | 55 (31.2%)     | 65 (31.2%)          | 55 (26.7%)  | 786 (44.6%)     | 268 (40.8%) |
| ASD                  | 31 (10.8%)          | 37 (12.9%)     | 67 (16.1%)          | 36 (12.6%)     | 66 (15.0%)          | 35 (19.9%)     | 12 (5.77%)          | 16 (7.77%)  | 216 (12.2%)     | 71 (10.8%)  |
| Autism               | 226 (78.7%)         | 230<br>(80.1%) | 254 (60.9%)         | 205<br>(71.9%) | 221 (50.3%)         | 86 (48.9%)     | 131<br>(63.0%)      | 135 (65.5%) | 762 (43.2%)     | 318 (48.4%) |

\*M (Male), F (Female), SA (Social Affect), RRB (Repetitive, Restrictive Behaviors), RAJ (Response to Joint Attention), IJA (Initiates Joint Attention)

eTable 3: Fit Statistics by ADOS-2 Algorithm

| Module     | Model          | M2/C2    | RMSEA               | SRMR | TLI  | CFI  |
|------------|----------------|----------|---------------------|------|------|------|
| Module 1.1 | Two Factor     | 691.715  | 0.109 (0.102-0.117) | 0.19 | 0.89 | 0.90 |
|            | Unidimensional | 278.699  | 0.064 (0.057-0.072) | 0.06 | 0.96 | 0.97 |
|            | RRB Factor     | 7.234    | 0.057 (0.016-0.104) | 0.03 | 0.92 | 0.97 |
|            | SA Factor      | 392.108  | 0.129 (0.118-0.141) | 0.19 | 0.91 | 0.93 |
| Module 1.2 | Two Factor     | 768.831  | 0.102 (0.096-0.109) | 0.20 | 0.91 | 0.93 |
|            | Unidimensional | 329.332  | 0.063 (0.057-0.07)  | 0.05 | 0.97 | 0.97 |
|            | RRB Factor     | 8.043    | 0.054 (0.019-0.095) | 0.03 | 0.95 | 0.98 |
|            | SA Factor      | 495.219  | 0.13 (0.12-0.14)    | 0.20 | 0.92 | 0.94 |
| Module 2.1 | Two Factor     | 856.196  | 0.121 (0.114-0.129) | 0.20 | 0.85 | 0.87 |
|            | Unidimensional | 500.909  | 0.091 (0.084-0.098) | 0.06 | 0.91 | 0.93 |
|            | RRB Factor     | 0.268    | 0 (0-0.034)         | 0.01 | 1.01 | 1.00 |
|            | SA Factor      | 457.576  | 0.139 (0.128-0.15)  | 0.16 | 0.85 | 0.89 |
| Module 2.2 | Two Factor     | 609.028  | 0.12 (0.111-0.129)  | 0.21 | 0.87 | 0.89 |
|            | Unidimensional | 472.017  | 0.105 (0.096-0.114) | 0.07 | 0.90 | 0.92 |
|            | RRB Factor     | 15.274   | 0.107 (0.061-0.16)  | 0.05 | 0.92 | 0.97 |
|            | SA Factor      | 301.433  | 0.132 (0.119-0.146) | 0.18 | 0.89 | 0.92 |
| Module 3   | Two Factor     | 2094.974 | 0.102 (0.098-0.106) | 0.18 | 0.91 | 0.92 |
|            | Unidimensional | 1463.464 | 0.085 (0.082-0.089) | 0.06 | 0.94 | 0.95 |
|            | RRB Factor     | 30.919   | 0.069 (0.049-0.092) | 0.04 | 0.91 | 0.97 |
|            | SA Factor      | 1256.446 | 0.123 (0.117-0.129) | 0.15 | 0.92 | 0.94 |

\*RMSEA (Root Mean Squared Error of Association), TLI (Tucker Lewis Index), CFI (Comparative Fit Index)

eFigure 1: Item Response Theory Curves by Race

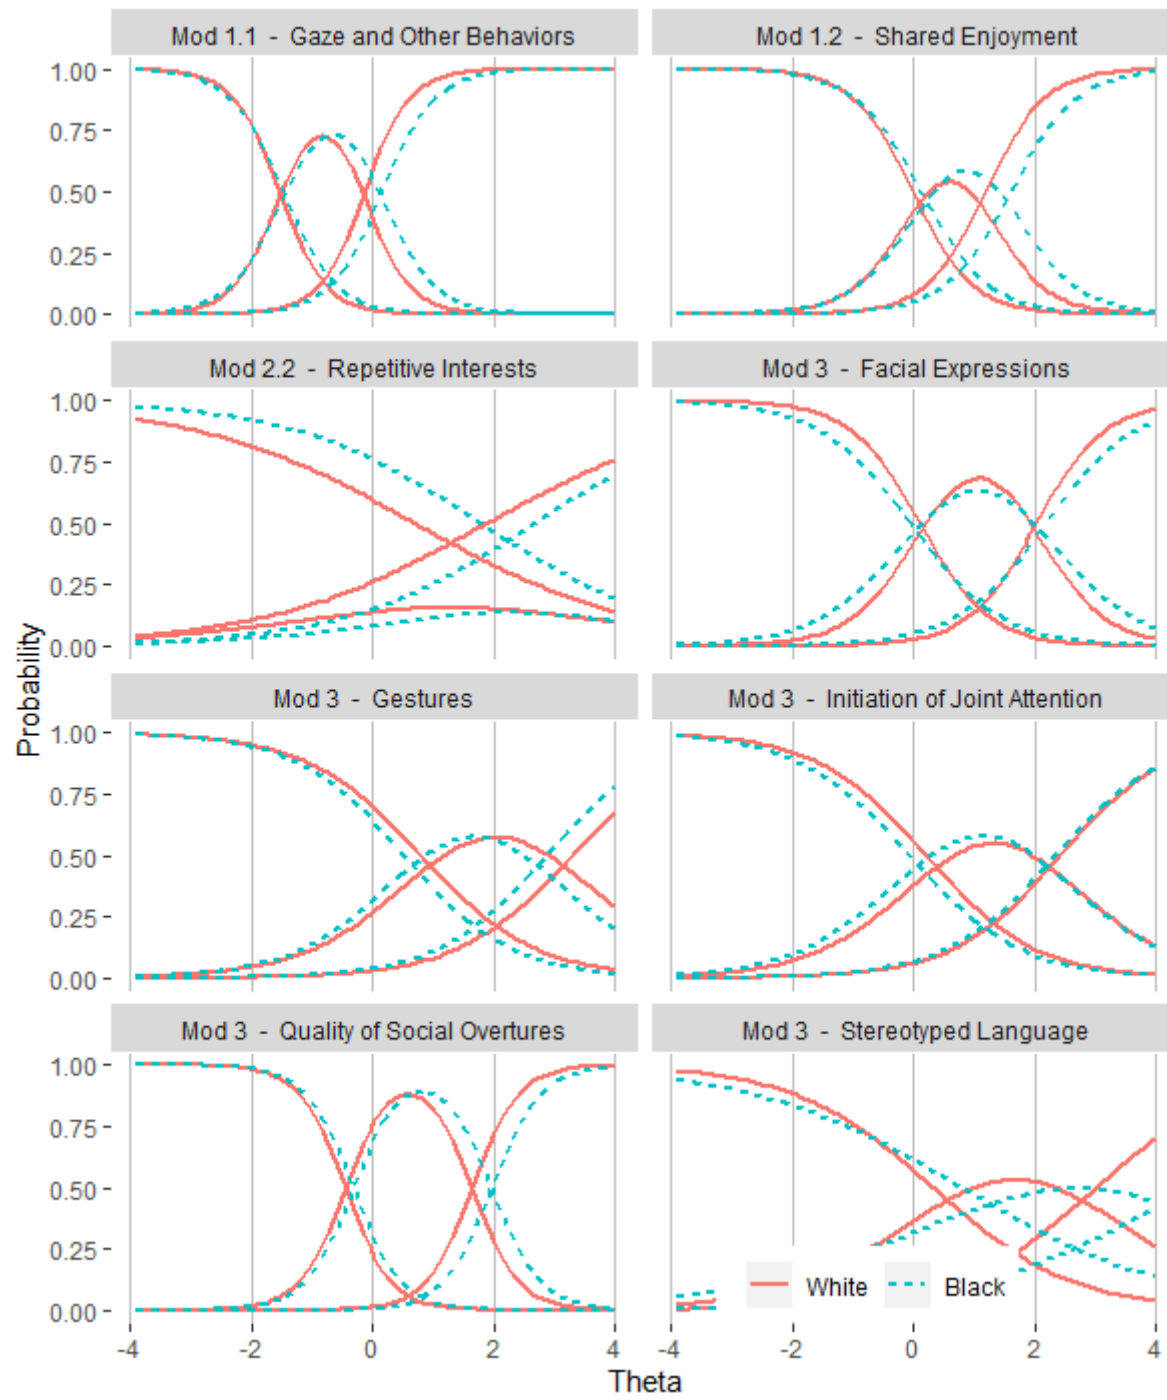

eFigure 2: Item Response Theory Curves by Sex

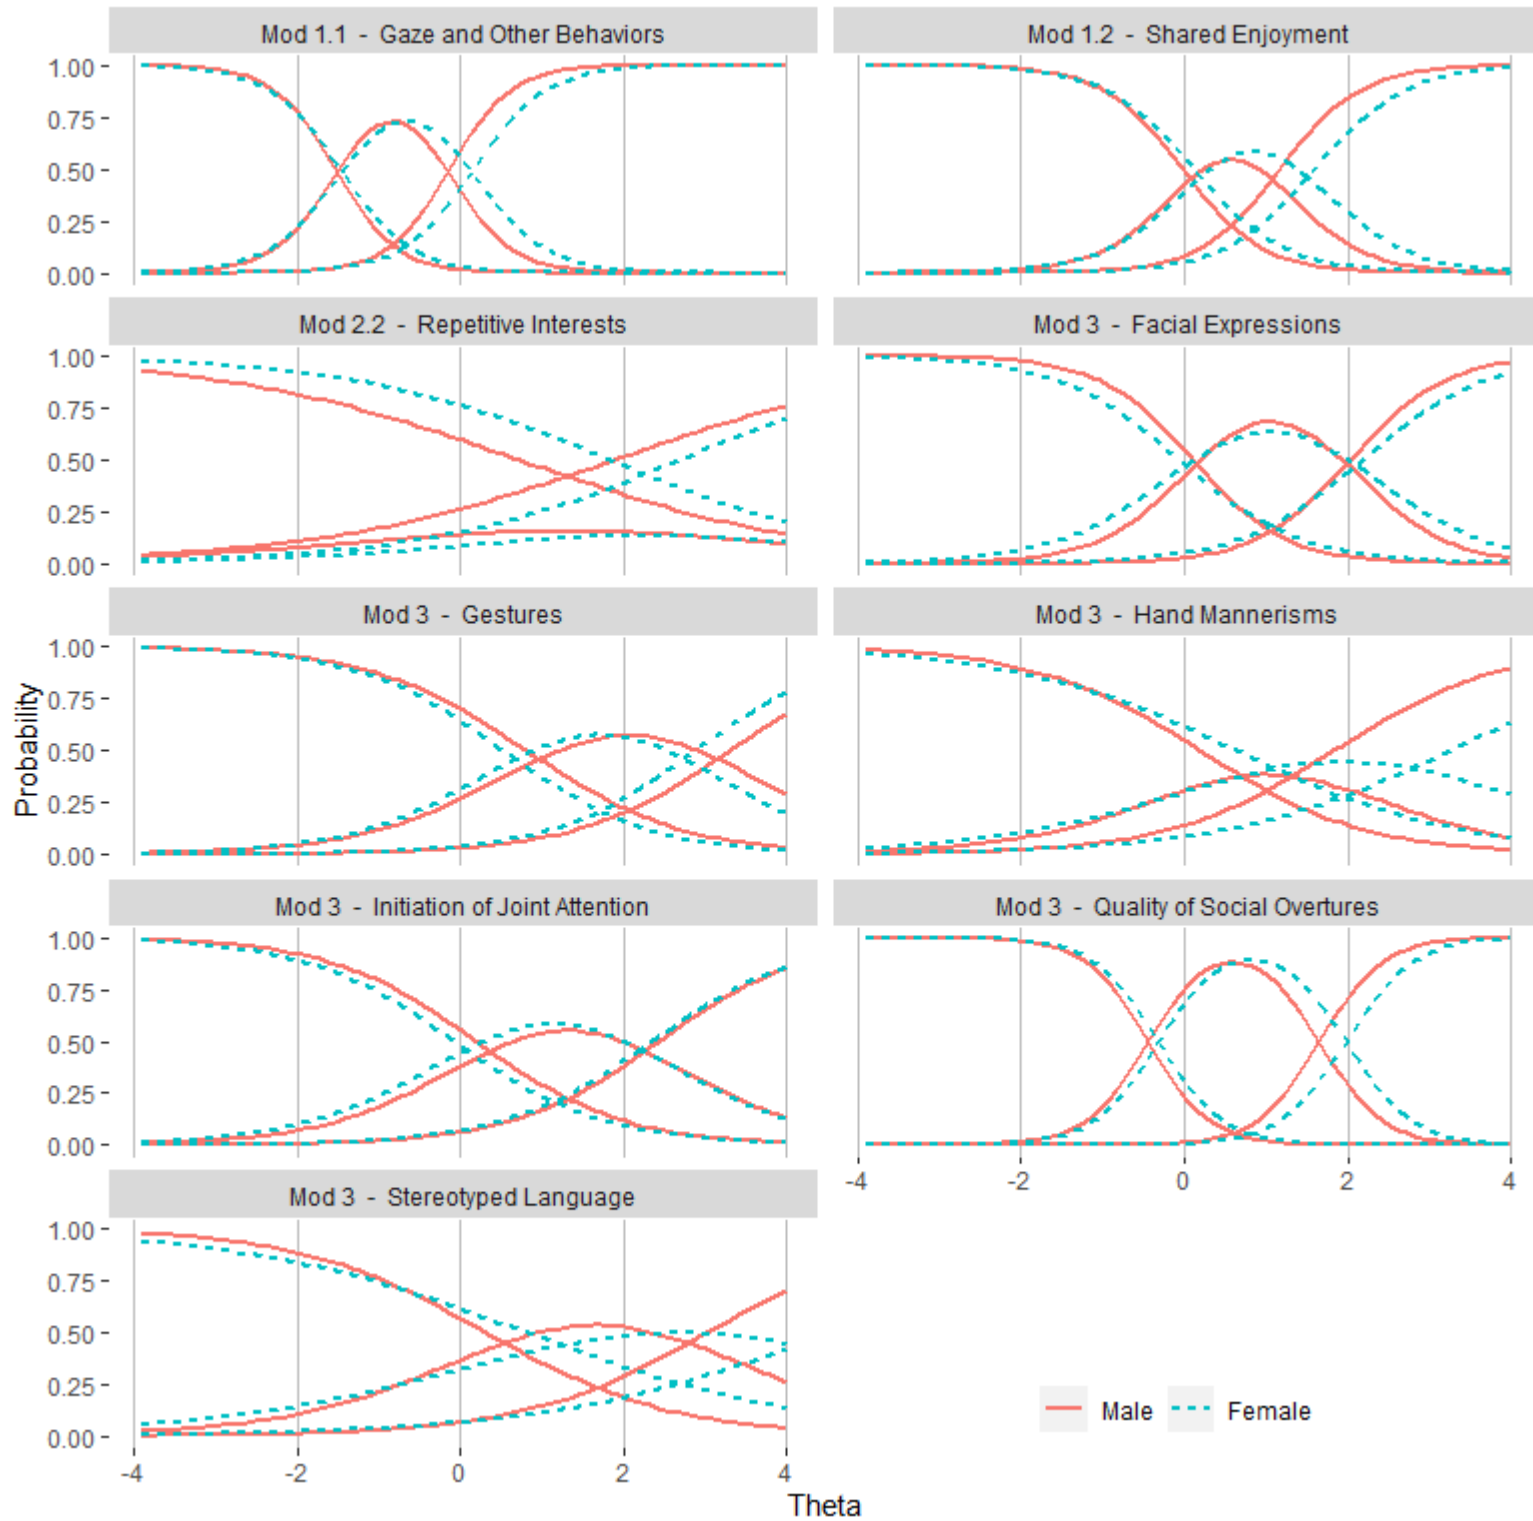

Supplement: jamanetwopen-e229498-s001.pdf [file jamanetwopen-e229498-s001.pdf]
